# Supplementary material for: Effect of Amplitude Spectral Area on Termination of Fibrillation and Outcomes in Pediatric Cardiac Arrest
Source: PubMed Central journal article supplement — J Am Heart Assoc. 2021 Jun 5;10(12):e020353. doi: 10.1161/JAHA.120.020353 (PMC8477851; doi:10.1161/jaha.120.020353), 2021-06-05

# **Supplemental Material**

**Appendix S1. The pediRES-Q Collaborative Investigators:** **Kamal Abulebda**, Riley Hospital for Children, Indianapolis, IN, US; **Diane Atkins**, University of Iowa Stead Family Children's Hospital, Iowa City, IA, US; **Shilpa Balikai**, University of Iowa Stead Family Children's Hospital, Iowa City, IA, US; **Marc Berg**, Lucile Packard Children's Hospital, Palo Alto, CA, US; **Robert Berg**, The Children's Hospital of Philadelphia, Philadelphia, PA, US; **Utpal Bhalala**, Children's Hospital of San Antonio, San Antonio, TX, US; **Matthew S. Braga**, Dartmouth-Hitchcock Medical Center, Lebanon, NH, US; **Corinne Buysse**, Erasmus MC–Sophia Children's Hospital, Rotterdam, NL; **Corrado Cecchetti**, Ospedale Pediatrico Bambino Gesù, Rome, IT; **Adam Cheng**, Alberta Children's Hospital, Calgary, AB, CA; **Andrea Christoff**, Children's Hospital at Westmead, Sydney, NSW; **Kelly Corbett**, Dartmouth-Hitchcock Medical Center, Lebanon, NH, US; **Allan DeCaen**, Stollery Children's Hospital, Edmonton, AB, CA; **Gabry deJong**, Erasmus MC–Sophia Children's Hospital, Rotterdam, NL; **Jimena del Castillo**, Hospital Materno-infantil Gregorio Marañón, Madrid, ES; **Maya Dewan**, Cincinnati Children's Hospital Medical Center, Cincinnati, OH, US; **Aaron Donoghue**, The Children's Hospital of Philadelphia, Philadelphia, PA, US; **Jordan Duval-Arnould**, Johns Hopkins University School of Medicine, Baltimore, MD, US; **Ivie Esangbedo**, UT Southwestern Dallas Children's Medical Center, Dallas, TX, US; **Michael Flaherty**, Massachusetts General Hospital, Boston, MA, US; **Stuart Friess**, St. Louis Children's Hospital, St. Louis, MO, US; **Sandeep Gangadharan**, Mount Sinai Kravis Children's Hospital, New York, NY, US; **Orsola Gawronski**, Ospedale Pediatrico Bambino Gesù, Rome, IT; **Jonathan Gilleland**, Alberta Children's Hospital, Calgary, AB, CA; **Heather Griffis**, Healthcare Analytics Unit, The Children's Hospital of Philadelphia, Philadelphia, PA, US; **Richard Hanna**, The Children's Hospital of Philadelphia, Philadelphia, PA, US; **Helen Harvey**, Rady Children's Hospital, San Diego, CA, US; **Ilana Harwayne-Gidansky**, Stony Brook Hospital, Stony Brook, NY, US; **Sarah Haskell**, University of Iowa Stead Family Children's Hospital, Iowa City, IA, US; **Jennifer Hayes**, Children's Hospital of Orange County, Los Angeles, CA, US; **Kiran Heber**, Children's Healthcare of Atlanta, Atlanta, GA, US; **Betsy Hunt**, Johns Hopkins University School of Medicine, Baltimore, MD, US; **Takanari Ikeyama**, Aichi Children's Health and Medical Center, Obu, Aichi, JP; **Priti Jani**, The University of Chicago Medicine Comer Children's Hospital, Chicago, IL, US; **Kaitlin Jones**, Children's Healthcare of Atlanta, Atlanta, GA, US; **Monica Kleinman**, Boston Children's Hospital, Boston, MA, US; **Lynda Knight**, Lucile Packard Children's Hospital Stanford, Palo Alto, CA, US; **Hiroshi Kurosawa**, Hyogo Prefectural Kobe Children's Hospital, Kobe, Hyogo, JP; **Javier Lasa**, Texas Children's Hospital, Houston, TX, US; **Kasper Glerup Lauridsen**, The Children's Hospital of Philadelphia, Philadelphia, PA, US; Aarhus University Hospital, Aarhus, DK; **Tara Lemoine**, Valley Children's Hospital, Madera, CA, US; **Tensing Maa**, Nationwide Children's Hospital, Columbus, OH, US; **Dori-Ann Martin**, Alberta Children's Hospital, Calgary, AB, CA; **Elizabeth Masse**, Seattle Children's Hospital, Seattle, WA, US; **Luz Marina Mejia**, Instituto de Ortopedia Infantil Roosevelt, Bogota, CO; **Michael Meyer**, Children's Hospital of Wisconsin, Milwaukee, WI, US; **Yee Hui Mok**, KK Women's & Children's Hospital, SG; **Ryan Morgan**, The Children's Hospital of Philadelphia, Philadelphia, PA, US; **Vinay Nadkarni**, The Children's Hospital of Philadelphia, Philadelphia, PA, US; **Sholeen Nett**, Dartmouth-Hitchcock Medical Center, Lebanon, NH, US; **Dana Niles**, The Children's Hospital of Philadelphia, Philadelphia, PA, US; **Michelle Olson**, Children's Hospital of Richmond, Richmond, VA, US; **Tara Petersen**, Children's Hospital of Wisconsin, Milwaukee, WI, US; **Gene Ong**, KK Women's & Children's Hospital, SG; **Prakad Rajapreyar**, Children's Hospital of Wisconsin, Milwaukee, WI, US; **Tia Raymond**, Medical City Children's Hospital, Dallas, TX, US; **Joan Roberts**, Seattle Children's Hospital, Seattle, WA, US; **Lindsay Ryerson**, Stollery Children's Hospital, Edmonton, AB, CA; **Anita Sen**, NewYork-Presbyterian Morgan Stanley Children's Hospital, New York, NY, US; **Marcy Singleton**, Dartmouth-Hitchcock Medical Center, Lebanon, NH, US; **Sophie Skellet**, Great Ormond Street Hospital, London, UK; **Daniel Stromberg**, Dell Children's Medical Center, Austin, TX, US; **Felice Su**, Lucile Packard Children's Hospital Stanford, Palo Alto, CA, US; **Robert Sutton**, The Children's Hospital of Philadelphia, Philadelphia, PA, US; **Todd Sweberg**, Cohen Children's Medical Center, New Hyde Park, NY, US; **Oscar Tegg**, The Children's Hospital at Westmead, Sydney, NSW; **Ken Tegtmeier**, Cincinnati Children's Hospital, Cincinnati, OH, US; **Alexis Topjian**, The Children's Hospital of Philadelphia, Philadelphia, PA, US; **Wendy Van Ittersum**, Akron Children's Hospital, Akron, OH, US; **Javier Urbano Villaescusa**, Hospital Materno-infantil Gregorio Marañón, Madrid, ES; **Ichiro Watanabe**, Tokyo Metropolitan Children's Hospital, Fuchū, Tokyo, JP; **Denise Welsby**, Great Ormond Street Hospital, London, UK; **Jesse Wenger**, Seattle Children's Hospital, Seattle, WA, US; **Heather Wolfe**, The Children's Hospital of Philadelphia, Philadelphia, PA, US; **Andrea Yeo**, National University Children's Medical Institute, SG; **Pricilla Yu**, UT Southwestern Dallas Children's Medical Center, Dallas, TX, US.

**Figure S1. The distribution of defibrillation current (Ohms) for the first shock (shock<sub>1</sub>) among the 39 subjects with defibrillation for VF (ventricular fibrillation).**

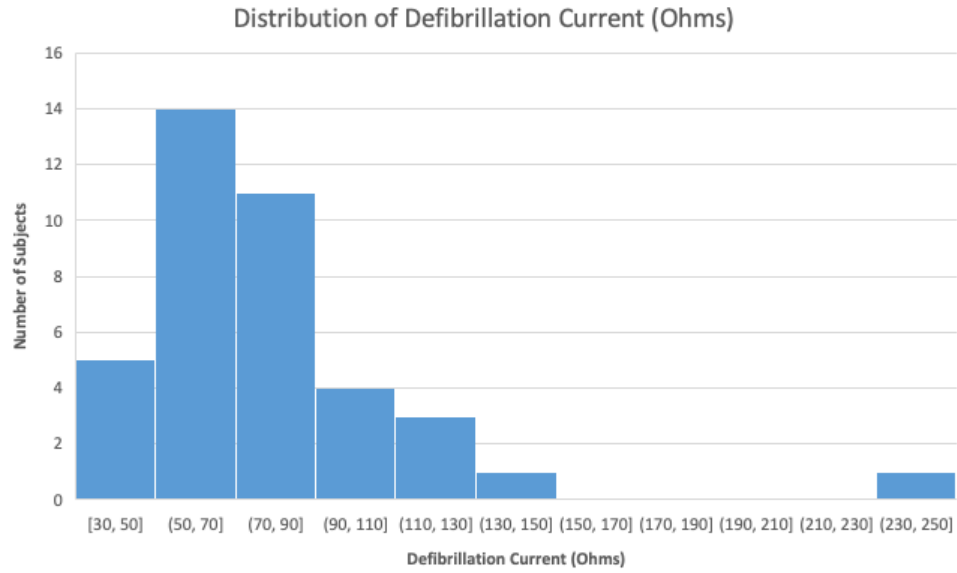

Supplement: JAH3-10-e020353-s001.pdf [file JAH3-10-e020353-s001.pdf]
